# Supplementary material for: Bi2O3and BiOCl electrospun nanosheets and morphology-dependent photocatalytic properties
Source: Royal Society of Chemistry journal article supplement (doi:10.1039/c4ra03754e), 2014-06-12
Supplement: c4ra03754e1.pdf [file c4ra03754e1.pdf]

## Supplementary Information

### Electrospun nanofibers of $\text{Bi}_2\text{O}_3$ and $\text{BiOCl}$ for enhanced UV-mediated photocatalytic degradation of anthraquinonic dye Alizarin Red S

Veluru Jagadeesh Babu,<sup>a\*</sup> R S R Bhavatharini,<sup>b</sup> and Seeram Ramakrishna,<sup>b,c\*</sup>

<sup>a</sup>UNAM-National Nanotechnology Research Center, Bilkent University, Ankara-06800,Turkey.

E-mail: [babu@unam.bilkent.edu.tr](mailto:babu@unam.bilkent.edu.tr) (V Jagadeesh Babu)

Tel: +90 312 290 3584; Fax: +90 312 266 4365.

<sup>b</sup>NUS Centre for nanofibers and Nanotechnology, Nanoscience and Nanotechnology Initiative, National University of Singapore, Singapore-117576, Singapore.

<sup>c</sup>Department of Mechanical Engineering, National University of Singapore, Singapore-117576, Singapore.

E-mail: [seeram@nus.edu.sg](mailto:seeram@nus.edu.sg) (Seeram Ramakrishna)

Tel: +65 6516 2216

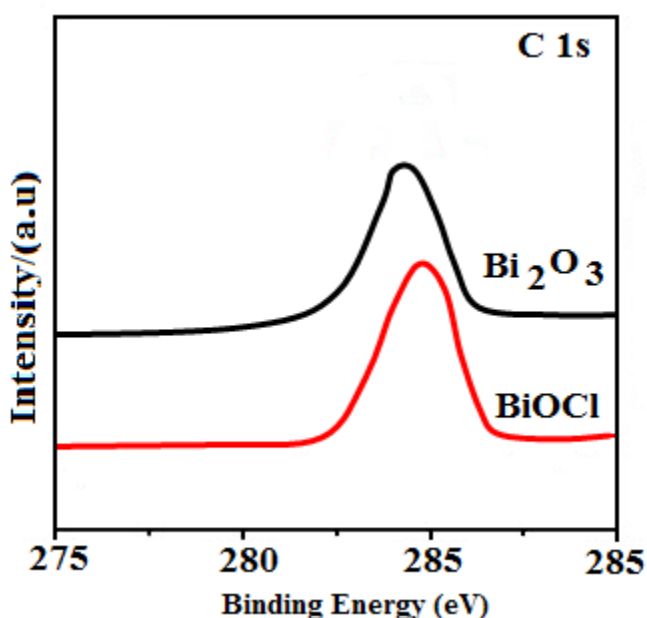

SI1: C 1s peaks for the nanostructured  $\text{BiOCl}$  and  $\text{Bi}_2\text{O}_3$ .

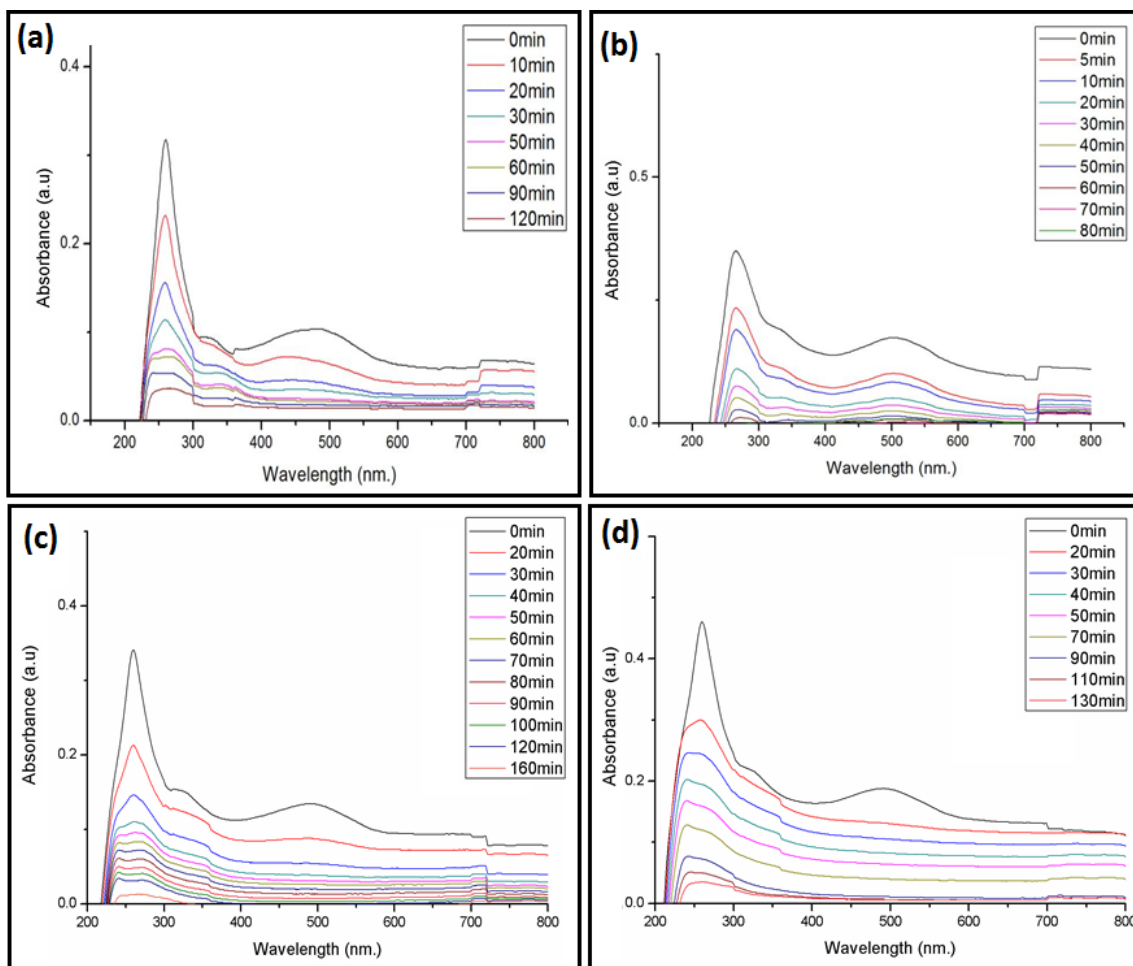

**SI-2** Spectral changes during UV-catalytic degradation for  $\text{Bi}_2\text{O}_3$  at (a)  $x=1\%$ , (b)  $x=2\%$ , (c)  $x=3\%$  and (d)  $x=4\%$  (w/v).

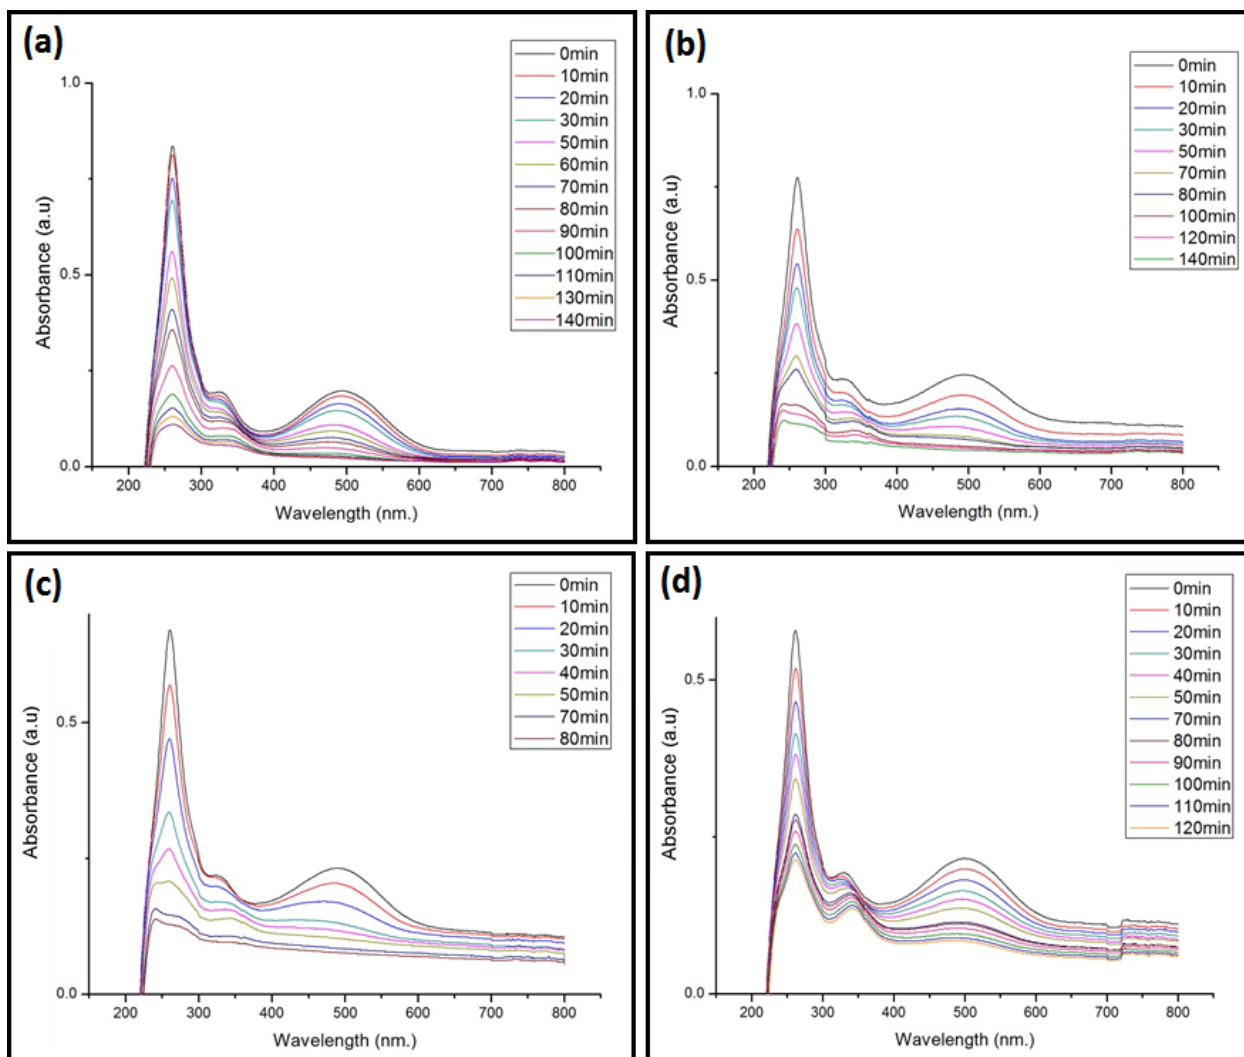

**SI-3** Spectral changes during UV-catalytic degradation for BiOCl at (a)  $x=1\%$ , (b)  $x=2\%$ , (c)  $x=3\%$  and (d)  $x=4\%$  (w/v).
